# Supplementary material for: Improved Open-Loop Glucose Control With Basal Insulin Reduction 90 Minutes Before Aerobic Exercise in Patients With Type 1 Diabetes on Continuous Subcutaneous Insulin Infusion
Source: Oxford University Press journal article supplement (doi:10.2337/dc18-2204), 2019-02-22
Supplement: dc182204supplementarydata.pdf [file dc182204supplementarydata.pdf]

SUPPLEMENTARY DATA

**Supplementary Figure S1.** Individual and mean change in glucose concentration in A, 80% BRR; B, 50% BRR; and C, pump suspension. \* denotes hypoglycemia developed (<70 mg/dL) during exercise. Colour coding used to differentiate between participants and carried out between treatment arms. Baseline blood glucose concentration denoted above each subject that experienced hypoglycemia during exercise (mg/dL).

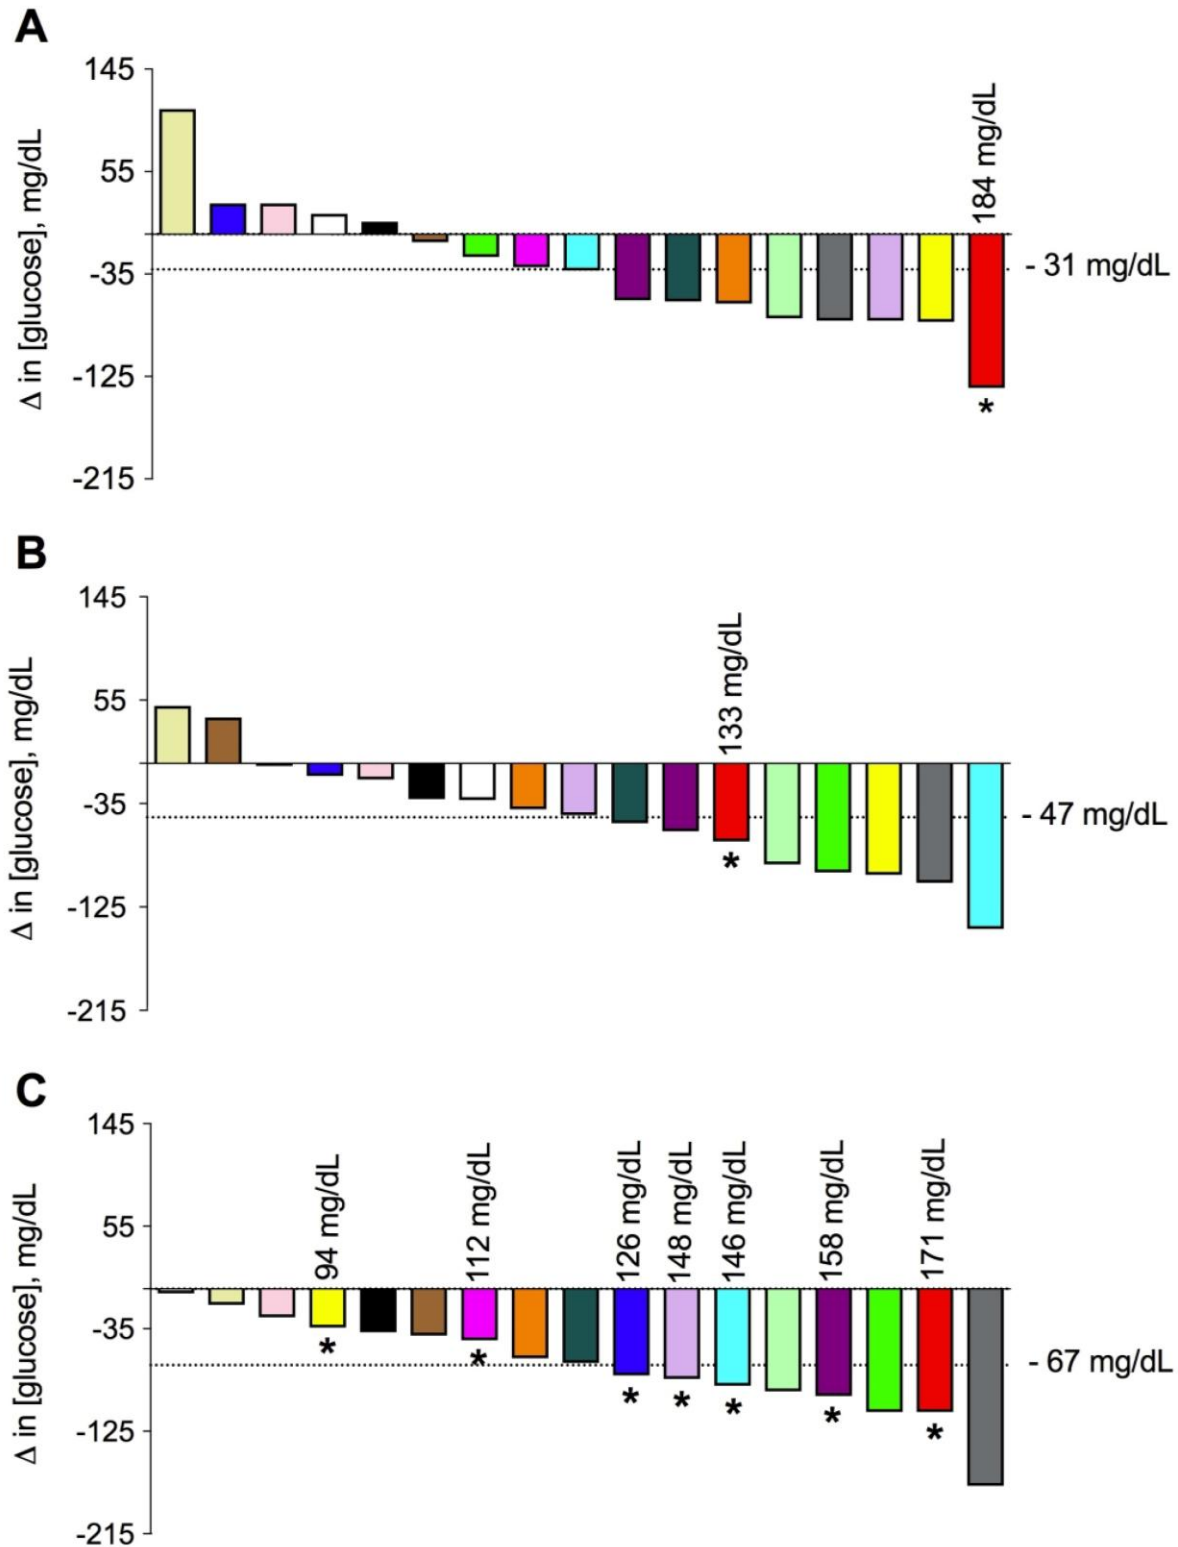

## SUPPLEMENTARY DATA
